# Supplementary material
Source: PubMed Central journal article supplement (PMC2630393)
Supplement: NIHMS88128-supplement-01.pdf [file NIHMS88128-supplement-01.pdf]

## **Supplemental Data**

Cell Metabolism, *Volume 9*

### **The Nuclear Orphan Receptor COUP-TFII Plays an Essential Role in Adipogenesis, Glucose Homeostasis, and Energy Metabolism**

Luoping Li, Xin Xie, Jun Qin, George S. Jeha, Pradip K. Saha, Jun Yan, Claire M. Haueter, Lawrence Chan, Sophia Y. Tsai, and Ming-Jer Tsai

## **Experimental Procedures**

### **shRNA constructs**

The short hairpin RNA (shRNA) for mouse COUP-TFII (5'-AGGTAACGTGATTGATTTCAGTATCTTA-3') was cloned into pSUPER.retro (OligoEngine) according to the manufacturer's instructions. The shRNA plasmid was co-transfected with pCL into 293T cells to produce retroviral supernatants. 48h after transfection, the culture medium was filtered through a 0.45 $\mu$ m filter and the viral supernatant was used for 3T3-L1 cells infection.

### **Triglyceride quantification**

Lipids in EWAT and liver were extracted by using a 2:1 Chloroform:Methanol mixture (V/V) (Folch et al., 1957). Relative triglyceride content in differentiated cells was quantified by using an adipogenesis assay kit (Chemicon) following the manufacturer's instructions.

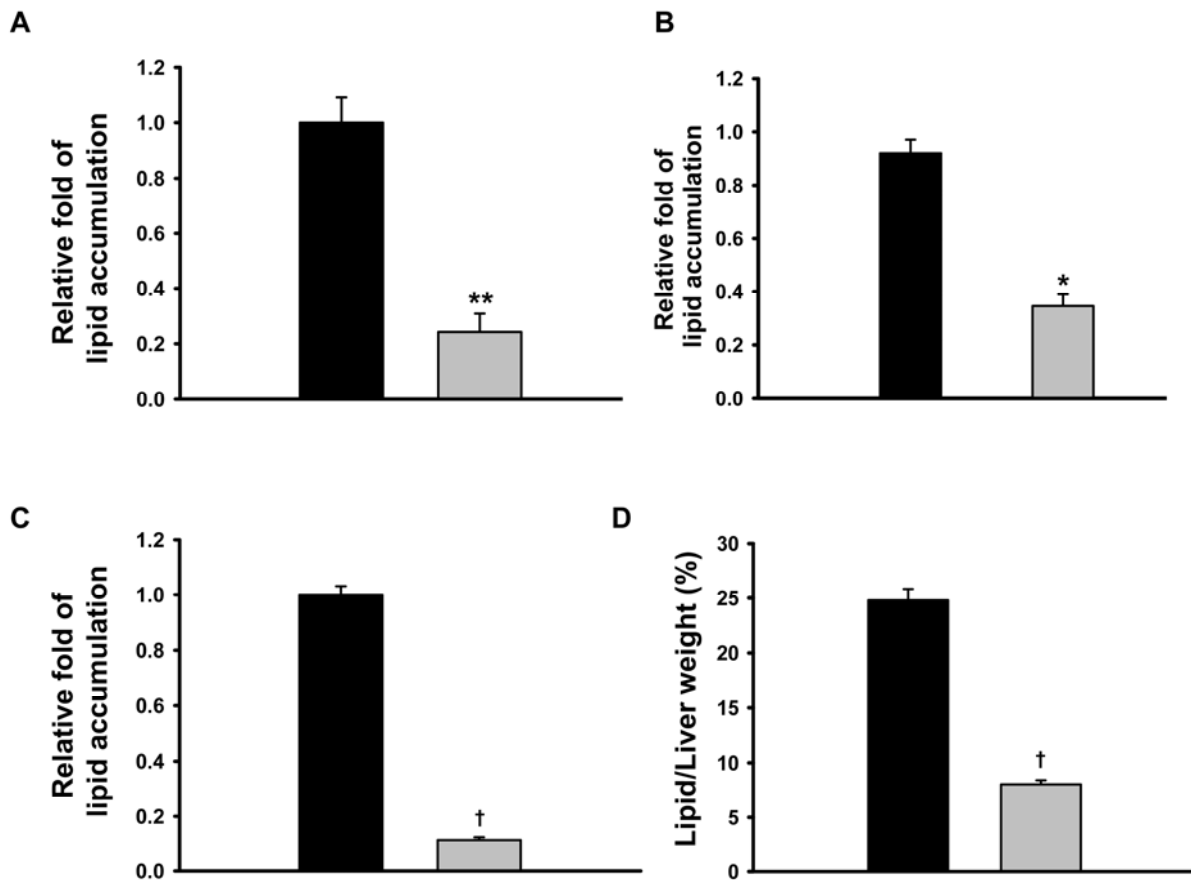

### Figure S1. Triglyceride quantification

(A). Corresponds to the Figure 2C lipid accumulation in EWAT of two-week-old *COUP-TFII*<sup>+/+</sup> (black box, n=3) and *COUP-TFII*<sup>+/-</sup> mice (gray box, n=3). Lipid is too low to be determined in 3-day-old mice and 5-day-old mice.

(B). Corresponds to Figure 3B (right), black box represent 3T3-L1 cells transfected with control siRNA, and gray box represent cells transfected with COUP-TFII siRNA (triplicates).

(C). Corresponds to Figure 3D (right), black box represent *COUP-TFII*<sup>flx/flx</sup> MEFs treated with 4-OH-TM, gray box represent *ROSA26*<sup>CRE-ERT2/+</sup>, *COUP-TFII*<sup>flx/flx</sup> MEFs treated with 4-OH-TM (triplicates).

(D). Corresponds to Fig 5E. Black box represents *COUP-TFII*<sup>+/+</sup> (n=5) and gray box represents *COUP-TFII*<sup>+/-</sup> mice (n=5). Data in (A-D) represent mean ± SEM. \* p<0.05, \*\*p<0.01, †p<0.0001.

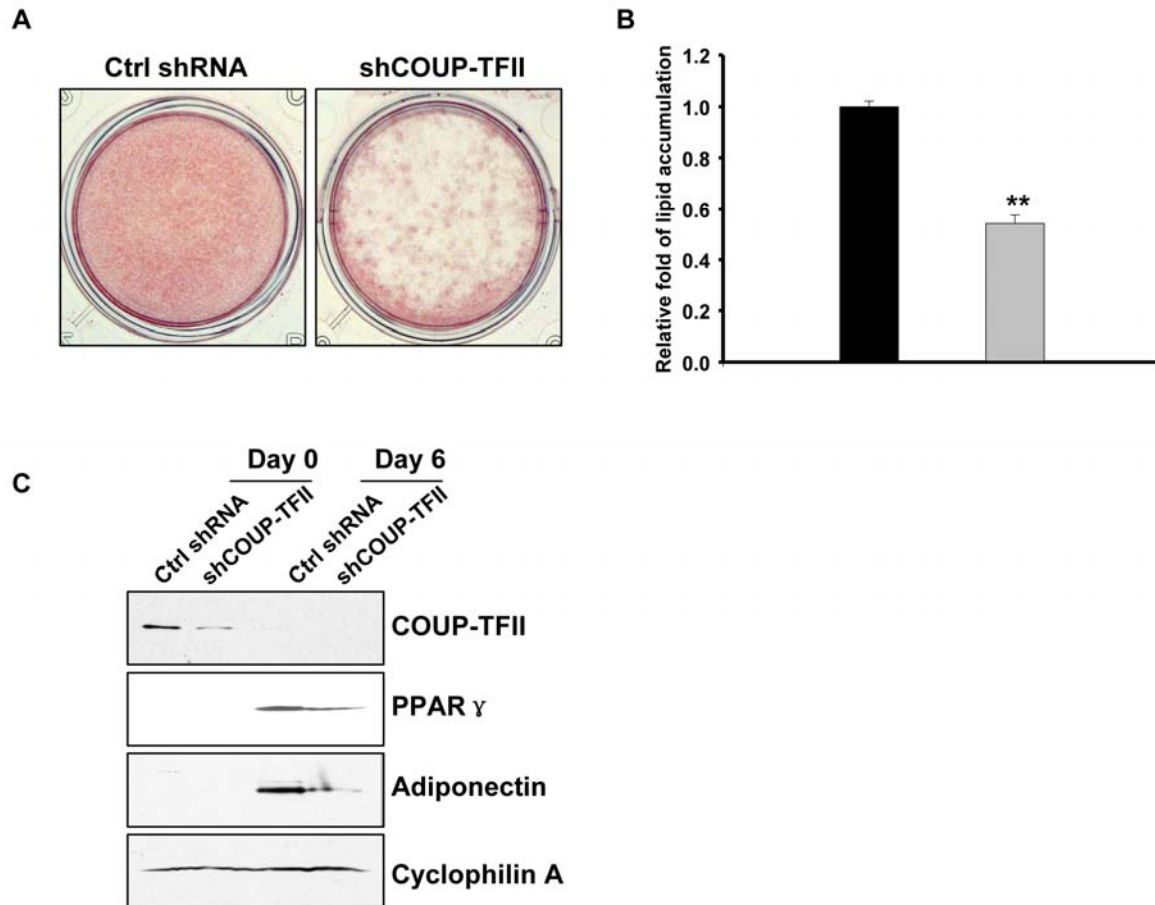

**Figure S2. Knock down COUP-TFII in 3T3-L1 cells using retrovirus system resulted in a decreased adipogenesis**

(A). 3T3-L1 cells were transduced with retrovirus expressing shRNA to COUP-TFII or a control shRNA before induction of adipogenesis with differentiation cock tail, Oil-Red-O staining of the cells 8 days after induction. (B). Triglyceride quantification to evaluate adipogenesis with triplicates induction plates by using adipogenesis assay kit (Chemicon), black box represent control shRNA transduced cells, gray box represent shCOUP-TFII transduced cells. Data represent mean  $\pm$  SEM. \*\* $p < 0.01$ . (C). Western blot analysis for COUP-TFII, and adipocyte markers, PPAR $\gamma$  and adiponection in 3T3-L1 cells before induction (day 0) and 6 days after induction. Cyclophilin A was used as the loading control.

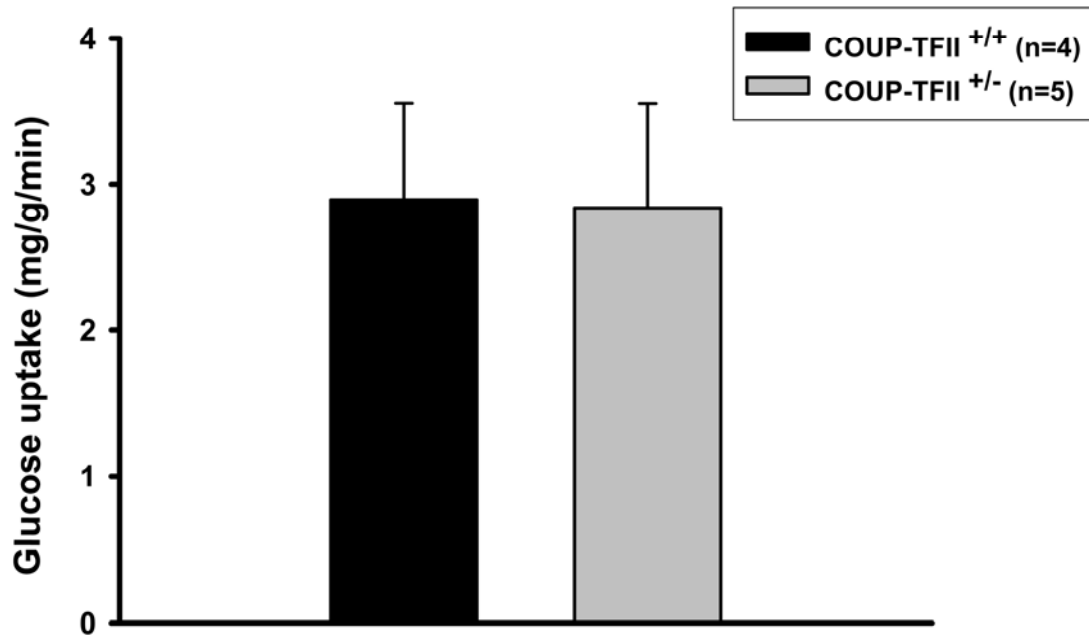

**Figure S3. Liver glucose uptake using euglycemic-hyperinsulinemic-clamp analysis**

Data represent mean  $\pm$  SEM.

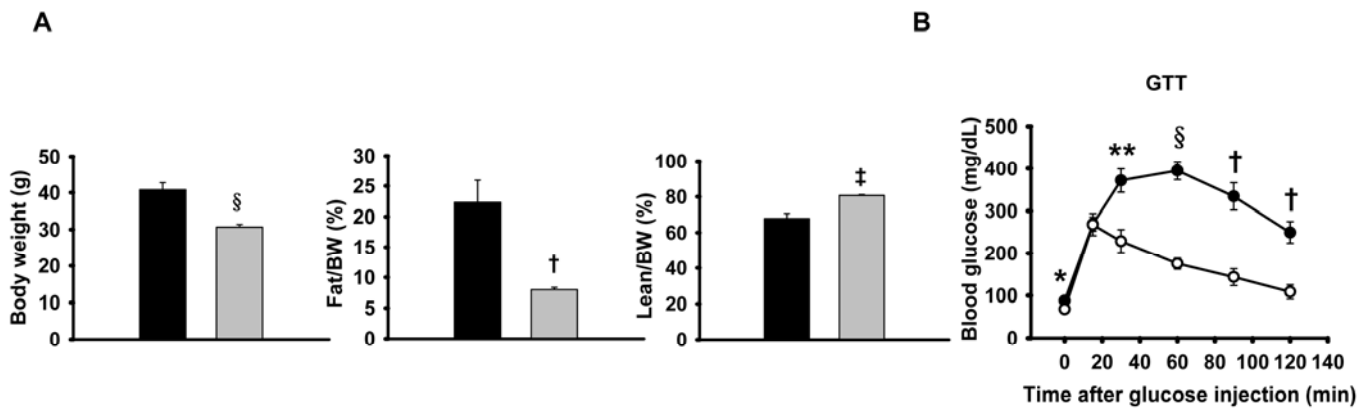

**Figure S4. *COUP-TFII*<sup>+/-</sup> mice are resistant to age-related obesity**

(A). Body weight (left panel) and MRI analysis of body fat and lean content (center and right panels) of 18-month-old *COUP-TFII*<sup>+/+</sup> (black box, n=6) and *COUP-TFII*<sup>+/-</sup> (gray box, n=7) littermates mice fed a normal chow. † p<0.005; ‡ p<0.001; § p<0.0005. (B). GTT on 9-month-old littermates of *COUP-TFII*<sup>+/+</sup> (filled circle, n=4) and *COUP-TFII*<sup>+/-</sup> (opened circle, n=4) mice. \* p<0.05; \*\* p<0.01; † p<0.005; § p<0.0005. Data in (A) and (B) represent mean ± SEM.

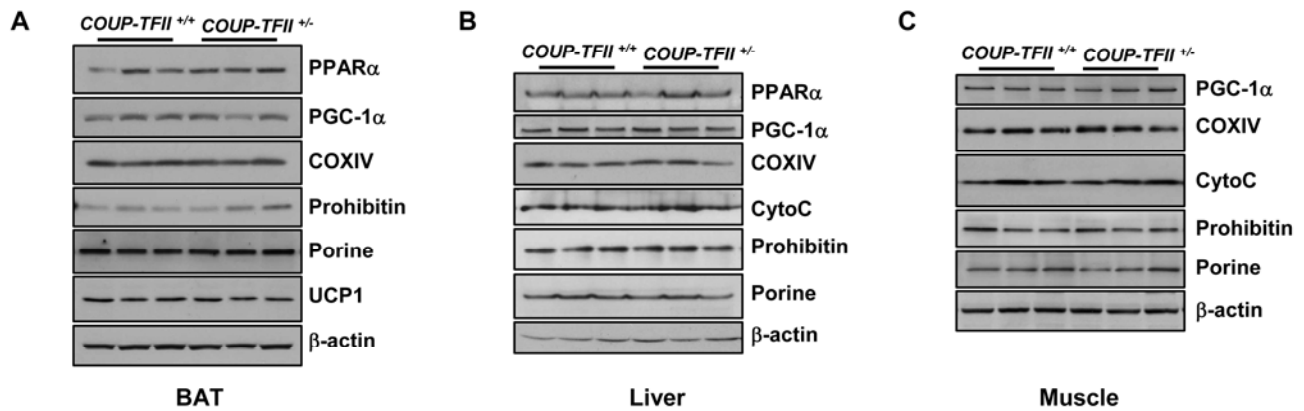

**Figure S5. Expression of mitochondrial proteins in *COUP-TFII*<sup>+/-</sup> mice**

Immunoblots of the BAT (A), liver (B), and skeletal muscle (C) (all in triplicates) extracts for PGC-1α, COXIV, cytochrome c, porine, prohibitin. β-actin was used as the loading control. Tissues were collected from littermates of *COUP-TFII*<sup>+/+</sup> and *COUP-TFII*<sup>+/-</sup> mice.

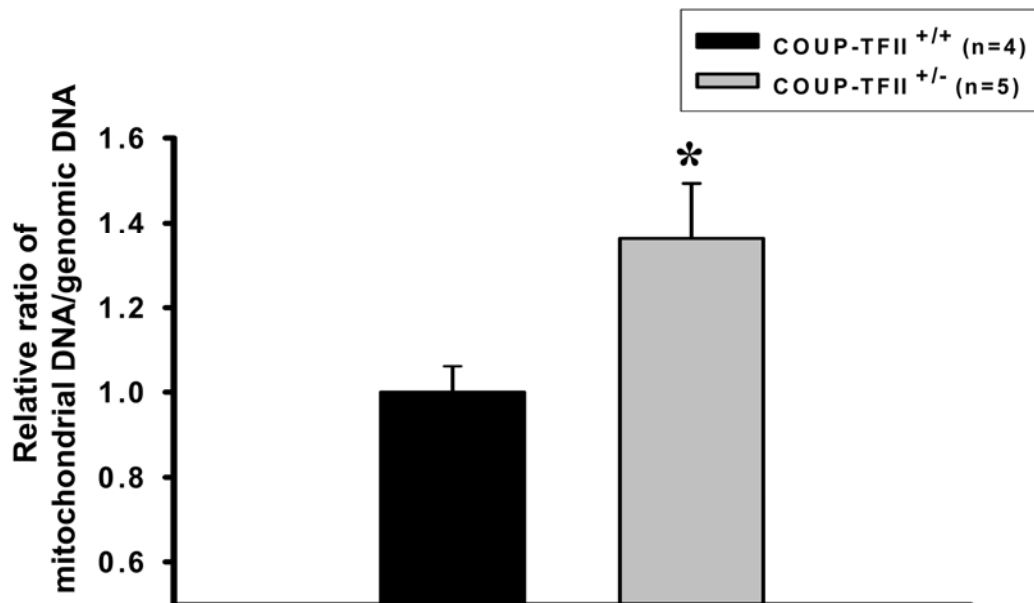

**Figure S6. Analysis of the relative ratio of mitochondrial DNA/genomic DNA by real-time PCR**

Real-time PCR analysis of COXII (encoded by mtDNA) versus cyclophilin A gene number in EWAT genomic DNA from both *COUP-TFII*<sup>+/+</sup> and *COUP-TFII*<sup>+/-</sup> littermates. Data represent mean  $\pm$  SEM. \*  $p < 0.05$ .

Reference:

Folch, J., Lees, M., and Sloane Stanley, G.H. 1957. A simple method for the isolation and purification of total lipids from animal tissues. *J Biol Chem.* 226:497-509.
